# Supplementary material for: Relapse-related long non-coding RNA signature to improve prognosis prediction of lung adenocarcinoma
Source: PubMed Central journal article supplement (PMC5045428; doi:10.18632/oncotarget.8825), 2016-04-18
Supplement: oncotarget-07-29720-s001.pdf [file oncotarget-07-29720-s001.pdf]

## **SUPPLEMENTARY FILES**

**Supplementary File S1: The differentially expressed lncRNAs between relapse-free LUAD patients (alive > 5 years) and LUAD patients who developed relapse (dead in 5 years) using two-tailed T-test with an adjusted p-value <0.01 after Bonferroni correction.**

**See Supplementary File 1**

**Supplementary File S2: Gene set enrichment results from gene expression profiles of LUAD patients with high-risk and low-risk group classified by the relapse-related lncRNA signature.**

**See Supplementary File 2**

**Supplementary File S3: Functional annotation clusters of enriched GO terms.**

**See Supplementary File 3**

**Supplementary File S4: KGEE pathway enrichment results.**

**See Supplementary File 4**
